# Supplementary material for: Real-Time On-Site Monitoring of Viruses in Wastewater Using Nanotrap® Particles and RICCA Technologies
Source: MDPI journal article supplement (doi:10.3390/bios14030115), 2024-02-21
Supplement: s1 [file s1]

# Real-Time On-site Monitoring of Viruses in Wastewater using Nanotrap® Particles and RICCA Technologies

Vishnu Sharma<sup>1</sup>, Hitomi Takamura<sup>2</sup>, Manish Biyani<sup>1\*</sup>, Ryo Honda<sup>2</sup>

## Supplementary Data Sheet

**Table-S1:** Comparison of viral RNA copy number (Ct value for N1 gene) determined by conventional Real-time RT-PCR for normal saline samples (lysate/ elute) concentrated by Nanotrap microbiome particles and PEG 8000 precipitation method.

| Sr. No. | Samples type | Spiked/real viruses (Copies/mL) | Ct values |           | Observed concentration (copies/ml) |          | Recovery efficiency |         |
|---------|--------------|---------------------------------|-----------|-----------|------------------------------------|----------|---------------------|---------|
|         |              |                                 | PEG       | NTP       | PEG                                | NTP      | PEG                 | NTP     |
| 1       | CoV-2_Low    | 100                             | 35.8±0.34 | 25.3±0.04 | 4.0.E+01                           | 2.9.E+05 | 40%                 | 290523% |
| 2       | CoV-2_High   | 10000                           | 26.3±0.08 | 23.5±0.02 | 1.9.E+04                           | 9.8.E+05 | 188%                | 9791%   |

**Table-S2:** Viral RNA copy number (Ct value for the N1 gene) determined by conventional real-time RT-PCR for studied wastewater treatment plant samples (elute) concentrated by the PEG 8000 precipitation method.

| PEG precipitation |                               |           |                                             |                     |
|-------------------|-------------------------------|-----------|---------------------------------------------|---------------------|
| Samples           | Spiked SARS-CoV-2 (copies/mL) | Ct values | Observed concentration of CDCN1 (copies/mL) | Recovery efficiency |
| WWTP A            | Unknown                       | >40       | ND                                          | -                   |
| WWTP B            | Unknown                       | 37.3±0.86 | 1.7.E+01                                    | -                   |
| WWTP C            | Unknown                       | 37.3±1.27 | 1.0.E+01                                    | -                   |

**Table-S3:** Viral RNA copy number (Ct value for the PMMoV-P1 gene) determined by conventional real-time RT-PCR for studied wastewater treatment plant samples (elute) concentrated by the PEG 8000 precipitation method.

| PEG precipitation |                                   |           |                                             |                     |
|-------------------|-----------------------------------|-----------|---------------------------------------------|---------------------|
| Samples           | PMMoV in a raw sample (copies/mL) | Ct values | Observed concentration of PMMoV (copies/mL) | Recovery efficiency |
| WWTP A            | 1.5.E+06                          | 27.5±0.12 | 9.1.E+05                                    | 62%                 |
| WWTP B            | 1.7.E+06                          | 28.6±0.17 | 6.1.E+05                                    | 37%                 |
| WWTP C            | 2.1.E+06                          | 28.0±0.06 | 7.8.E+05                                    | 37%                 |
